# Supplementary material for: Identification of a Pro-Angiogenic Potential and Cellular Uptake Mechanism of a LMW Highly Sulfated Fraction of Fucoidan from Ascophyllum nodosum
Source: MDPI journal article supplement (doi:10.3390/md14100185), 2016-10-17
Supplement: s1 [file s1]

# Identification of a Pro-Angiogenic Potential and Cellular Uptake Mechanism of a LMW Highly Sulfated Fraction of Fucoïdan from *Ascophyllum nodosum*

Nicolas Marinval, Pierre Saboural, Oualid Haddad, Murielle Maire, Kevin Bassand, Frederic Geinguenaud, Nadia Djaker, Khadija Ben Akrou, Marc Lamy de la Chapelle, Romain Robert, Olivier Oudar, Erwan Guyot, Christelle Laguillier-Morizot, Angela Sutton, Cedric Chauvierre, Frederic Chaubet, Nathalie Charnaux and Hanna Hlawaty

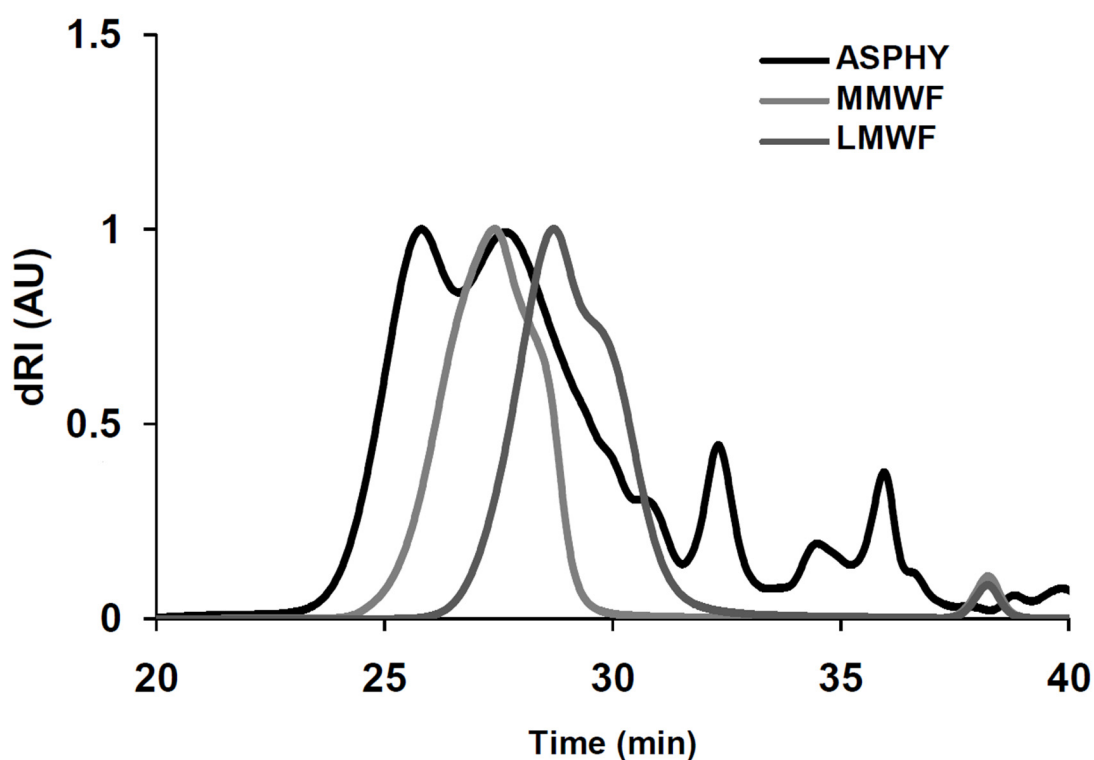

Figure S1. Polydispersity analysis. The polydispersity of the fucoidans ASPHY (black), MMWF (dark grey) and LMWF (light grey) represents the homogeneity of the population in this figure.

A)

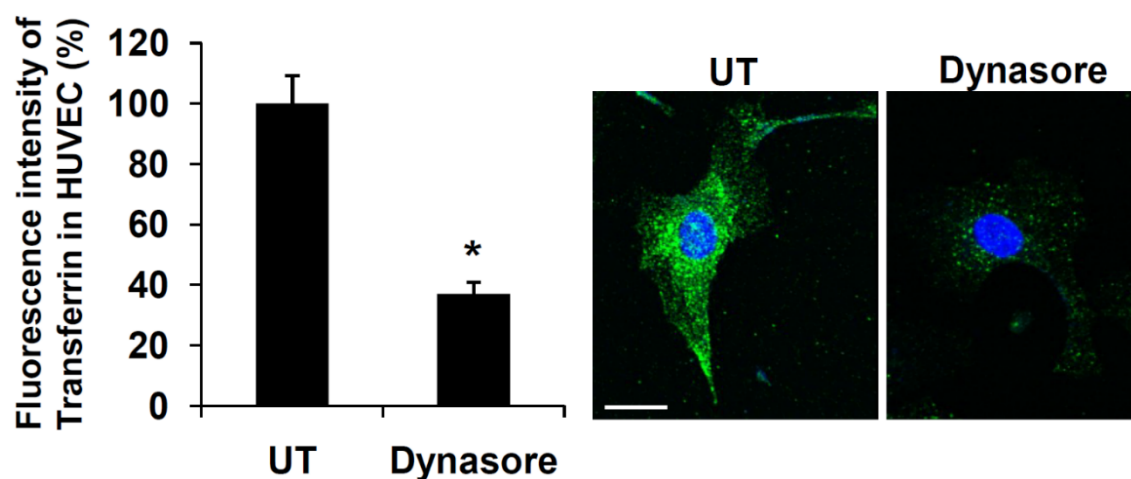

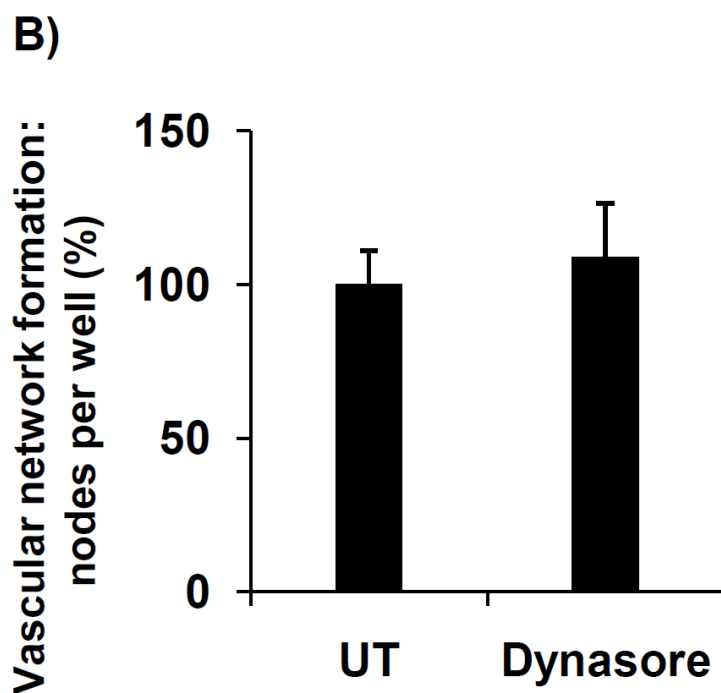

**Figure S2.** Transferrin endocytosis. (A) Transferrin has been used as a control of the inhibition of the clathrin-mediated endocytosis and its uptake in HUVECs was quantified after treatment or not (untreated—UT) with dynasore (Dapi—blue, Transferrin—green, bar = 10 $\mu$ m). \*  $p < 0.05$  Dynasore versus UT; (B) HUVECs were treated with dynasore 30 min before their seeding on Matrigel. The microvascular network formation was scored and presented as 100% of UT condition.
